# Supplementary material
Source: PubMed Central journal article supplement (PMC1636568)

Juice

100 in. screen

Computer for task control

Computer for stimulus presentation

Polarized glasses

Joystick

LCD projectors

Polarized filters

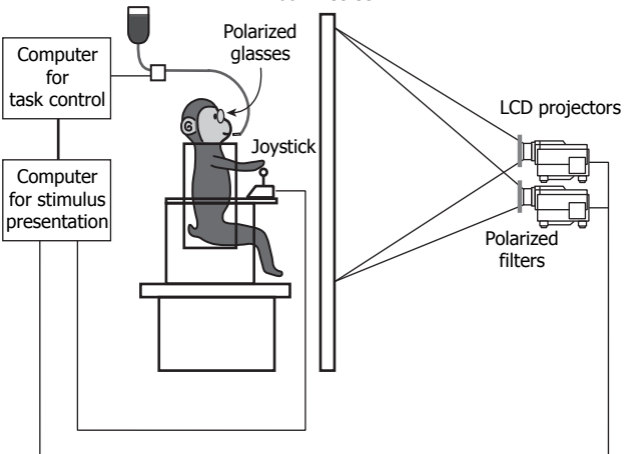

Supplement: pnas_0604277103_1.pdf [file pnas_0604277103_1.pdf]
