# Supplementary material
Source: PubMed Central journal article supplement (PMC1636568)

# Location-selective neuron

Route #1

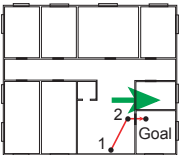

CP #1

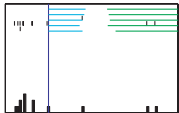

CP #2

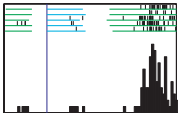

Route #6

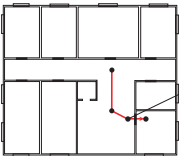

CP #2

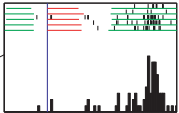

50 spikes/s  
1 s

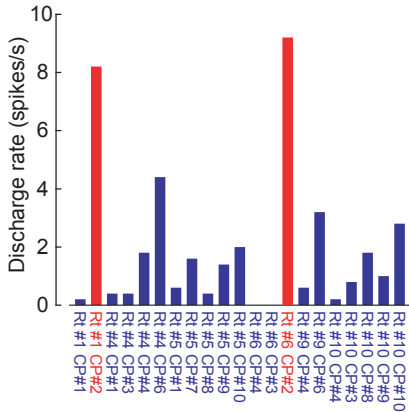

Supplement: pnas_0604277103_2.pdf [file pnas_0604277103_2.pdf]

# Movement-selective neuron

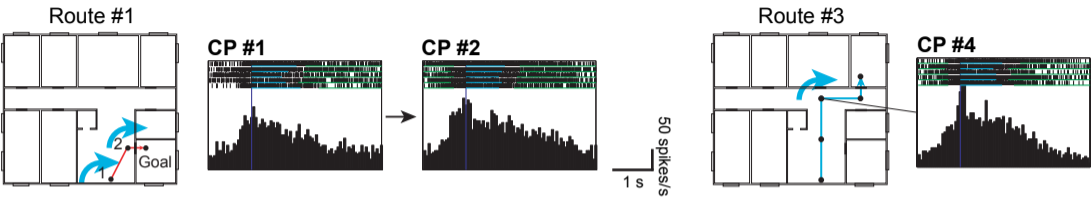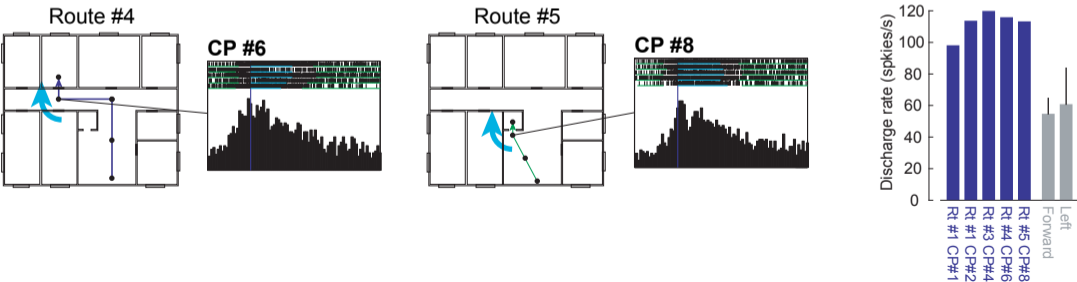

Supplement: pnas_0604277103_3.pdf [file pnas_0604277103_3.pdf]
